# Supplementary material for: Differential Recruitment of Dendritic Cells Subsets to Lymph Nodes Correlates with a Protective or Permissive T-Cell Response duringLeishmania(Viannia)BraziliensisorLeishmania(Leishmania)AmazonensisInfection
Source: Hindawi journal article supplement (doi:10.1155/2016/7068287), 2016-01-01
Supplement: f1 [file 7068287.f1.pdf]

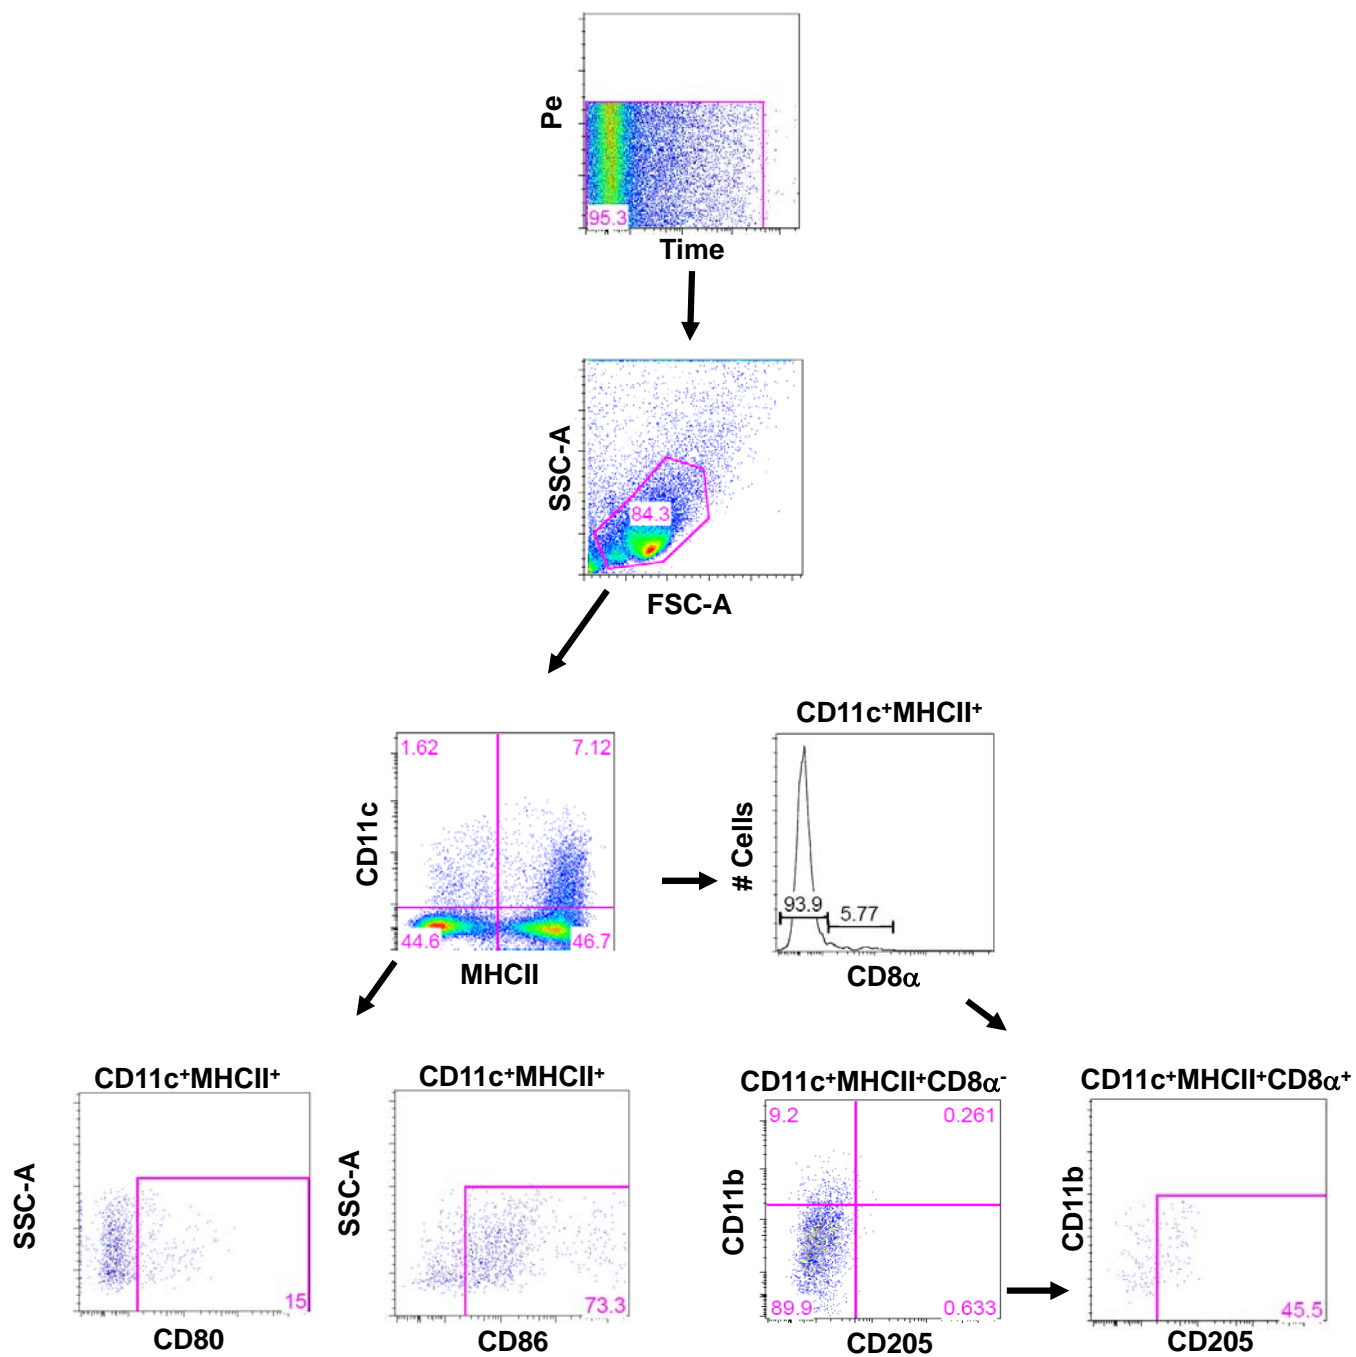

Figure 1

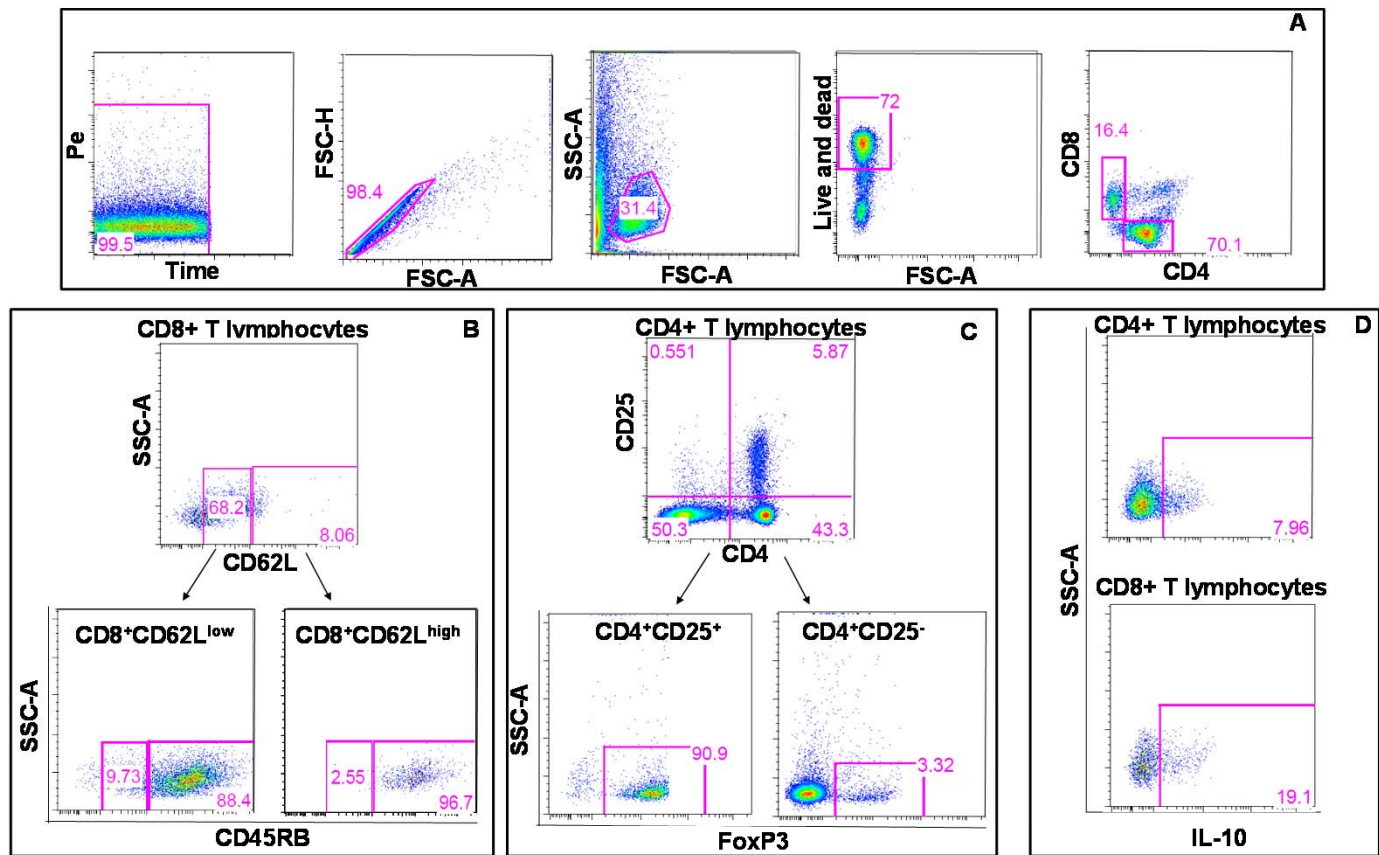

Figure 2
